# Supplementary material for: Shape-Depended Biological Properties of Ag3PO4 Microparticles: Evaluation of Antimicrobial Properties and Cytotoxicity in In Vitro Model—Safety Assessment of Potential Clinical Usage
Source: PubMed Central journal article supplement (PMC6886340; doi:10.1155/2019/6740325), 2019-11-20
Supplement: 6740325.f1.pdf [file 6740325.f1.pdf]

1 **Supplementary material**

2  
3 **Shape-depended biological properties of Ag<sub>3</sub>PO<sub>4</sub> microparticles. Evaluation of**  
4 **antimicrobial properties and cytotoxicity in *in vitro* model. Safety assessment of potential**  
5 **clinical usage**

6  
7 Karol P. Steckiewicz<sup>1,4</sup>, Julia Zwara<sup>2</sup>, Maciej Jaskiewicz<sup>3</sup>, Szymon Kowalski<sup>1</sup>, Wojciech  
8 Kamysz<sup>3</sup>, Adriana Zaleska-Medynska<sup>2</sup>, Iwona Inkielewicz-Stepniak<sup>1</sup>

9  
10 1- Department of Medical Chemistry, Medical University of Gdansk, Faculty of Medicine Gdansk, Poland  
11 2-Department of Department of Environmental Technology, Faculty of Chemistry, University of Gdansk, Gdansk,  
12 Poland  
13 3- Department of Inorganic Chemistry, Faculty of Pharmacy, Medical University of Gdansk, Gdansk, Poland  
14 4- Department of Histology, Medical University of Gdansk, Faculty of Medicine Gdansk, Poland

15  
16 correspondence should be address to Iwona Inkielewicz-Stepniak; iinkiel@gumed.edu.pl

17  
18  
19  
20 Supplementary Table 1: Minimal Inhibitory Concentrations [ $\mu\text{g/mL}$ ] of conventional drugs  
21 against reference strains of microorganism.

22

|               | <b><i>S. aureus</i></b><br><b>ATCC 25923</b> | <b><i>S. aureus</i></b><br><b>ATCC 33591</b> |             | <b><i>C. albicans</i></b><br><b>ATCC 10231</b> | <b><i>A. niger</i></b><br><b>ATCC 16404</b> |
|---------------|----------------------------------------------|----------------------------------------------|-------------|------------------------------------------------|---------------------------------------------|
| Ampicillin    | 0.5                                          | > 128                                        | Fluconazole | 2                                              | 8                                           |
| Ciprofloxacin | 1                                            | 0.25                                         |             |                                                |                                             |
| Linezolid     | 1                                            | 1                                            | Nystatin    | 2                                              | 8                                           |
| Vancomycin    | 1                                            | 1                                            |             |                                                |                                             |

23

24
